# Supplementary material
Source: PubMed Central journal article supplement (PMC4183631)
Supplement: ja5057906_si_001.pdf [file ja5057906_si_001.pdf]

**Supporting Information for**  
**Molecular Basis for Self-Assembly of a Human Host-Defense Peptide that Entraps**  
**Bacterial Pathogens**

Phoom Chairatana and Elizabeth M. Nolan\*

Department of Chemistry, Massachusetts Institute of Technology, Cambridge, MA, 02139

\*Corresponding author: [lnolan@mit.edu](mailto:lnolan@mit.edu)

Phone: 617-452-2495

Fax: 617-324-0505

This supporting information includes:

|                                                                                          |     |
|------------------------------------------------------------------------------------------|-----|
| <b>Supporting Experimental Section</b> .....                                             | S3  |
| <b>Instrumentation</b> .....                                                             | S3  |
| <b>Site-Directed Mutagenesis and Purification of Mutant Peptides</b> .....               | S4  |
| <b>Circular Dichroism Spectroscopy</b> .....                                             | S4  |
| <b>Thiol Quantification Assays</b> .....                                                 | S5  |
| <b>Disulfide Bond Connectivity Determination</b> .....                                   | S5  |
| <b>Design of the Synthetic Gene for preproHD6</b> .....                                  | S7  |
| <b>Supporting Tables</b> .....                                                           | S8  |
| <b>Table S1.</b> Amino acid sequences of peptides presented in this work.....            | S8  |
| <b>Table S2.</b> Characterization of peptides presented in this work.....                | S9  |
| <b>Table S3.</b> MS analysis of peptides after manual Edman degradation .....            | S10 |
| <b>Table S4.</b> Calculated sedimentation coefficients of F2A.....                       | S11 |
| <b>Table S5.</b> Calculated sedimentation coefficients of F29A.....                      | S12 |
| <b>Table S6.</b> Calculated sedimentation coefficients using HYDROPRO.....               | S12 |
| <b>Table S7.</b> Primers employed for subcloning and site-directed mutagenesis.....      | S13 |
| <b>Table S8.</b> Templates and primer pairings employed in site-directed mutagenesis.... | S13 |
| <b>Scheme S1.</b> Determination of disulfide bond connectivity of F2A.....               | S14 |
| <b>Supporting Figures</b> .....                                                          | S15 |
| <b>Figure S1.</b> Sequence alignment of human $\alpha$ -defensins.....                   | S15 |
| <b>Figure S2.</b> Comparison of crystal structures of HD5 and HD6 .....                  | S15 |
| <b>Figure S3.</b> Crystal structure of HD6 showing F2A, H27, and L32 .....               | S16 |
| <b>Figure S4.</b> Analytical HPLC traces of His <sub>6</sub> -proHD6 and HD6.....        | S17 |
| <b>Figure S5.</b> Analytical HPLC traces of native and mutant HD6.....                   | S18 |
| <b>Figure S6.</b> TEM of HD6 at different concentrations.....                            | S19 |
| <b>Figure S7.</b> TEM of native and mutant HD6 in 10 mM Tris-maleate pH 6.4.....         | S19 |
| <b>Figure S8.</b> Sedimentation velocity experiments of F2A.....                         | S20 |
| <b>Figure S9.</b> Sedimentation velocity experiments of F29A.....                        | S21 |
| <b>Figure S10.</b> CD spectra of HD5 and native and mutant HD6.....                      | S22 |
| <b>Figure S11.</b> Agglutination assays of <i>L. monocytogenes</i> ATCC 19115.....       | S23 |
| <b>Figure S12.</b> Agglutination assays of <i>E. coli</i> ATCC 25922.....                | S24 |
| <b>Figure S13.</b> Representative image of agglutination assays.....                     | S25 |
| <b>Supporting References</b> .....                                                       | S25 |

## Supporting Experimental Section

**Instrumentation.** An Agilent 1200 series instrument equipped with a thermostatted column compartment set at 20 °C, and a multi-wavelength detector set at 220 and 280 nm (500 nm reference wavelength with 100 nm bandwidth), was used to perform analytical and semi-preparative high-performance liquid chromatography (HPLC). An Agilent PrepStar 218 instrument outfitted with an Agilent ProStar 325 dual-wavelength detector set at 220 and 280 nm was used to perform preparative HPLC. A Cliepus C18 column (5  $\mu$ m pore, 4.6 x 250 mm, Higgins Analytical, Inc.) set at a flow rate of 1 mL/min was employed for all analytical HPLC experiments. A ZORBAX C18 column (5  $\mu$ m pore, 9.4 x 250 mm, Agilent Technologies) set at a flow rate of 5 mL/min was employed for all semi-preparative HPLC purification. A Luna 100 Å C18 LC column (10  $\mu$ m pore, 21.2 x 250 mm, Phenomenex) set at a flow rate of 10 mL/min was used for all preparative HPLC purification. HPLC-grade acetonitrile (MeCN) and trifluoroacetic acid (TFA) were routinely purchased from EMD and Alfa Aesar, respectively. For all HPLC runs, solvent A was 0.1% TFA/H<sub>2</sub>O and solvent B was 0.1% TFA/MeCN.

An Agilent 1260 series LC system equipped with an Agilent 6230 TOF system housing an Agilent Jetstream ESI source was employed to perform high-resolution mass spectrometry. A Poroshell 120 EC-C18 column (2.7  $\mu$ m particle size, 2.1 x 100 mm, Agilent Technologies) set at a flow rate of 0.4 mL/min was used for all LC-MS analyses. The samples were analyzed by using a solvent gradient of 5–95% B over 5 min with 0.1% formic acid/H<sub>2</sub>O as solvent A, and 0.1% formic acid/MeCN (LC-MS grade, Sigma-Aldrich). The MS profiles were analyzed and deconvoluted by using Agilent Technologies Quantitative Analysis 2009 software version B.03.02.

All routine optical absorption measurements and the agglutination assays were performed by using a Beckman Coulter DU 800 UV-visible spectrophotometer maintained at ambient temperature. Extinction coefficients (280 nm) for native and mutant HD6 were calculated by using ExPASy ProtParam are listed in Table S1. Solution and buffer pH values

were verified by using a Mettler Toledo S20 SevenEasy pH meter or a HANNA Instruments HI 9124 pH meter equipped with a microelectrode.

**Site-Directed Mutagenesis and Purification of Mutant Peptides.** The HD6 mutants (Table S1) were generated by employing a modified Quick-Change site-directed mutagenesis protocol (Stratagene). The pET28b-*proHD6* plasmid was used as the template. The forward and reverse primers are listed in Table S7 and the primer pairings are listed in Table S8. For all mutagenesis reactions, the PCR conditions were 95 °C for 30 min (1x); 55 °C for 1 min and 68 °C for 17 min (25x); 4 °C hold. Following PCR amplification using PfuTurbo DNA polymerase, a 1.5- $\mu$ L aliquot of *DpnI* was added to a 50- $\mu$ L PCR reaction and it was incubated at 37 °C for 1.5 h. A second 1.5- $\mu$ L aliquot of *DpnI* was then added to the PCR reaction and it was incubated at 37 °C for another 1.5 h. The *DpnI* digests were transformed into chemically-competent *E. coli* TOP10 cells. Single colonies were selected and grown in 5 mL of LB media containing 50  $\mu$ g/mL of kanamycin (37 °C, 16-18 h). The plasmids were isolated by using a QIAprep spin miniprep kit and their identities were verified by DNA sequencing. The overexpression and purification of His<sub>6</sub>-*proHD6* mutants, and preparation and purification of HD6 mutants, were conducted as described for native HD6. During the trypsin-catalyzed cleavage reaction, degradation of the 32-residue F29A product was observed by analytical HPLC following incubation times >15 min. The peptide yields ranged from 1.8 mg/mL (F2A) to 4.5 mg/mL (H27W). The HPLC retention time, and results from LC-MS for these mutants are presented in Table S2. All experiments were performed with at least two independently prepared batches of each peptide.

**Circular Dichroism Spectroscopy.** For all circular dichroism (CD) measurements, peptide solutions (20  $\mu$ M, 300  $\mu$ L) were prepared in 10 mM sodium phosphate pH 7.4 and transferred to a 1-mm path-length quartz CD cell (Hellma). The CD spectra were collected from 260-190 nm at 1-nm intervals (5 s averaging time, three independent scans per wavelength) by using an Aviv Model 202 CD spectrometer operated at room temperature. The data obtained from the three scans were averaged and the resulting averaged spectra are reported. The CD

spectra were collected from at least two independently prepared and purified samples of each peptide and in two independent trials.

**Thiol Quantification Assays.** The assays were conducted by modifying a reported literature protocol.<sup>S1</sup> To obtain a GSH standard curve, 0, 3, 6, 9, 12, or 15  $\mu\text{L}$  of GSH (3 mM in 10 mM HCl) was added to Milli-Q water to achieve a volume of 15  $\mu\text{L}$  and then added to 943  $\mu\text{L}$  of the assay buffer (100 mM sodium phosphate, 200  $\mu\text{M}$  EDTA, pH 7.0; degassed for at least 1 h by bubbling Ar). A 42- $\mu\text{L}$  aliquot of 2,2'-dithiodipyridine (DTDP, 4 mM in 24 mM HCl) was added to the solution to achieve the final volume of 1 mL. The resulting solution was incubated at room temperature for 15 min and the absorbance at 341 nm was measured. The GSH standard curve was obtained by plotting corrected absorbance versus GSH concentration.

For quantifying the number of free thiol residues present in each peptide sample, peptide stock solutions were freshly prepared in Milli-Q water and the concentrations were determined by optical absorption spectroscopy. Then, aliquots of the peptide stock solutions were diluted with the assay buffer and an aliquot of DTDP was added to each sample as described above to achieve final peptide concentrations of 6  $\mu\text{M}$ . The solutions were incubated at room temperature for 15 min and the absorbance at 341 nm was measured. The number of free thiol residues in each sample was determined by using the GSH standard curve. These assays were conducted with at least two independently prepared and purified samples of each peptide and in three independent trials.

**Disulfide Bond Connectivity Determination.** The canonical  $\alpha$ -disulfide bond connectivity (Cys<sup>4</sup>—Cys<sup>31</sup>, Cys<sup>6</sup>—Cys<sup>20</sup>, Cys<sup>10</sup>—Cys<sup>30</sup>) for each of the six HD6 mutant peptides presented in this work was confirmed by employing trypsin digestion followed by four cycles of manual Edman degradation (Scheme S1, Table S3). Each HD6 mutant (1 mg) was incubated in 1.0 mL of 100 mM Tris-HCl pH 8.0, 20 mM CaCl<sub>2</sub>, 1 M urea, and 0.1 mg/mL of trypsin at 37 °C. F2A, V22T, and F29A were incubated for 3 h and I25T, H27A, and H27W were incubated for 11 h before 100  $\mu\text{L}$  of 6% TFA was added to quench the reaction. The digested peptides were

purified by semi-preparative HPLC (20–40% B over 20 min at 4 mL/min) and lyophilized to dryness.

Each purified peptide product containing three disulfide bonds (Scheme S3) was then subjected to four cycles of manual Edman degradation.<sup>S2</sup> In each cycle, the peptide was resuspended in 200  $\mu$ L of 5% phenylisothiocyanate (PITC, Thermo Scientific) in 50% pyridine/H<sub>2</sub>O, and incubated at 50 °C for 30 min. The reaction was then dried at 60 °C under vacuum, resuspended in 100  $\mu$ L of anhydrous TFA, and incubated at 45 °C for 10 min. The TFA was removed by flushing with nitrogen and the remaining crude material was dried at 45 °C under vacuum. Then, 200  $\mu$ L of pre-chilled 5% pyridine/H<sub>2</sub>O was added to the crude product and the resulting cloudy solution was extracted with 250  $\mu$ L of pre-chilled *n*-butyl acetate three times. The aqueous layer was dried at 60 °C under vacuum to obtain the peptide for LC-MS analysis and the next cycle of Edman degradation. The results from LC-MS are listed in Table S3.

### **Design of the synthetic gene for preproHD6**

A synthetic gene for human preproHD6 was ordered from DNA 2.0 and optimized for *E. coli* codon usage. The synthetic gene was designed to include a N-terminal *NdeI* restriction site (N-terminal Met residue encoded by the *NdeI* site) and a C-terminal stop codon followed by a *XhoI* restriction site. It contains an N-terminal TEV protease cleavage site (ENLYFQG) followed by the 19-residue signal peptide sequence (“pre”) and 81-residue proHD6. The TEV cleavage sequence and the “pre” region were not utilized in this work. The synthetic gene was obtained in pJ201 from DNA 2.0 and this pJ201-*preproHD6* was employed as a template for PCR amplification of proHD6.

In the nucleotide and amino acid sequences below, the sequences corresponding to the TEV site is in italics and the *NdeI* and *XhoI* codons and corresponding amino acid are in bold.

### **NdeI-TEV-preproHD6-STOP-XhoI**

#### ***E. coli* optimized nucleotide sequence:**

**CATATGGAGAATCTGTATTTCCAGGGTCGCACCCTCACGATCCTCACCGCCGTCCTGCTG**  
GTAGCCCTCCAGGCTAAGGCCGAGCCGCTGCAAGCAGAGGACGATCCGCTGCAGGCAA  
AGCATAACGAAGCGGACGCGCAGGAACAACGCGGTGCGAACGATCAAGACTTTGCGGTTA  
GCTTCGCGGAGGATGCTAGCAGCTCTCTGCGTGCGCTGGGTAGCACGCGTGCATTCACTT  
GCCACTGCCGTCGTAGCTGTTACTCCACCGAATATAGCTATGGCACCTGCACGGTGATGG  
GCATTAATCATCGCTTTTGTGTCTGTA**ACTCGAG**

#### **Translated sequence for NdeI-TEV-preproHD6-STOP-XhoI:**

**H M E N L Y F Q G R T L T I L T A V L L V A L Q A K A E P L Q A E D D P L Q A K A Y E A D**  
A Q E Q R G A N D Q D F A V S F A E D A S S L R A L G S T R A F T C H C R R S C Y S T  
E Y S Y G T C T V M G I N H R F C C L

**Table S1.** Amino acid sequences of peptides employed in this work.<sup>a</sup>

| Peptide | Amino Acid Sequence              |
|---------|----------------------------------|
| HD6     | AFTCHCRRSCYSTEYSYGTCTVMGINHRFCCL |
| F2A     | AATCHCRRSCYSTEYSYGTCTVMGINHRFCCL |
| V22T    | AFTCHCRRSCYSTEYSYGTCTTMGINHRFCCL |
| I25T    | AFTCHCRRSCYSTEYSYGTCTVMGTNHRFCCL |
| H27A    | AFTCHCRRSCYSTEYSYGTCTVMGINARFCCL |
| H27W    | AFTCHCRRSCYSTEYSYGTCTVMGINWRFCCL |
| F29A    | AFTCHCRRSCYSTEYSYGTCTVMGINHRACCL |

<sup>a</sup> Mutations are colored in red.



**Table S2.** Characterization of peptides employed in this work.

| Peptide <sup>a</sup>      | Retention Time (min) <sup>b</sup> | Free Thiol <sup>c</sup> | Calculated <i>m/z</i> | Observed <i>m/z</i> | Yield (mg/L culture) | $\epsilon_{280}$ ( $M^{-1}cm^{-1}$ ) <sup>d</sup> |
|---------------------------|-----------------------------------|-------------------------|-----------------------|---------------------|----------------------|---------------------------------------------------|
| HD6                       | 16.9                              | 0.23 ± 0.08             | 3705.5                | 3705.5              | 1.9                  | 4845                                              |
| F2A                       | 15.7                              | 0.05 ± 0.06             | 3629.5                | 3629.1              | 1.8                  | 4845                                              |
| V22T                      | 15.8                              | 0.10 ± 0.04             | 3707.5                | 3707.5              | 2.5                  | 4845                                              |
| I25T                      | 16.3                              | 0.21 ± 0.05             | 3693.4                | 3693.5              | 4.1                  | 4845                                              |
| H27A                      | 17.1                              | 0.16 ± 0.12             | 3642.2                | 3641.8              | 2.6                  | 4845                                              |
| H27W                      | 17.4                              | 0.07 ± 0.06             | 3754.5                | 3754.5              | 4.5                  | 10345                                             |
| F29A                      | 16.3                              | 0.06 ± 0.09             | 3629.5                | 3629.1              | 4.3                  | 4845                                              |
| His <sub>6</sub> -proHD6  | 21.8                              | n.d. <sup>e</sup>       | 11124                 | 11124               | 26.3                 | 6335                                              |
| His <sub>6</sub> -proF2A  | 20.2                              | n.d. <sup>e</sup>       | 11048                 | 11048               | 36.6                 | 6335                                              |
| His <sub>6</sub> -proV22T | 20.6                              | n.d. <sup>e</sup>       | 11126                 | 11126               | 31.0                 | 6335                                              |
| His <sub>6</sub> -proI25T | 20.7                              | n.d. <sup>e</sup>       | 11112                 | 11112               | 33.2                 | 6335                                              |
| His <sub>6</sub> -proH27A | 20.8                              | n.d. <sup>e</sup>       | 11059                 | 11059               | 31.4                 | 6335                                              |
| His <sub>6</sub> -proH27W | 20.5                              | n.d. <sup>e</sup>       | 11173                 | 11173               | 23.4                 | 11835                                             |
| His <sub>6</sub> -proF29A | 20.2                              | n.d. <sup>e</sup>       | 11048                 | 11048               | 35.6                 | 6335                                              |

<sup>a</sup> See Table S1 for amino acid sequences. The mutant peptides are all oxidized. <sup>b</sup> Retention times determined by using analytical RP-HPLC on a C18 column and a gradient of 10–60% B over 30 min at 1 mL/min. <sup>c</sup> Free thiol content determined by using the DTDP assay (mean ± SDM, *n* ≥ 3). <sup>d</sup> Extinction coefficients at 280 nm were calculated by using the on-line resource ExpASY ProtParam. <sup>e</sup> n.d. = not determined.

**Table S3.** MS analysis of peptides after each Edman degradation cycle.

| Peptide | No. of Edman Degradation Cycles | Molecular Formula                                                                | Calculated <i>m/z</i> | Observed <i>m/z</i> |
|---------|---------------------------------|----------------------------------------------------------------------------------|-----------------------|---------------------|
| F2A     | 0                               | C <sub>144</sub> H <sub>216</sub> N <sub>42</sub> O <sub>47</sub> S <sub>7</sub> | 3509.4                | 3509.2              |
|         | 1                               | C <sub>129</sub> H <sub>197</sub> N <sub>39</sub> O <sub>43</sub> S <sub>7</sub> | 3204.3                | 3204.3              |
|         | 2                               | C <sub>120</sub> H <sub>184</sub> N <sub>36</sub> O <sub>40</sub> S <sub>5</sub> | 2929.2                | 2929.3              |
|         | 3                               | C <sub>108</sub> H <sub>160</sub> N <sub>34</sub> O <sub>34</sub> S <sub>6</sub> | 2669.0                | 2669.0              |
|         | 4                               | C <sub>92</sub> H <sub>142</sub> N <sub>30</sub> O <sub>30</sub> S <sub>3</sub>  | 2243.0                | 2242.9              |
| V22T    | 0                               | C <sub>149</sub> H <sub>218</sub> N <sub>42</sub> O <sub>48</sub> S <sub>7</sub> | 3587.4                | 3587.2              |
|         | 1                               | C <sub>134</sub> H <sub>199</sub> N <sub>39</sub> O <sub>44</sub> S <sub>7</sub> | 3282.3                | 3282.4              |
|         | 2                               | C <sub>119</sub> H <sub>182</sub> N <sub>36</sub> O <sub>41</sub> S <sub>5</sub> | 2931.2                | 2931.3              |
|         | 3                               | C <sub>107</sub> H <sub>158</sub> N <sub>34</sub> O <sub>35</sub> S <sub>6</sub> | 2671.0                | 2671.1              |
|         | 4                               | C <sub>91</sub> H <sub>140</sub> N <sub>30</sub> O <sub>31</sub> S <sub>3</sub>  | 2245.0                | 2244.9              |
| I25T    | 0                               | C <sub>148</sub> H <sub>216</sub> N <sub>42</sub> O <sub>48</sub> S <sub>7</sub> | 3573.3                | 3573.1              |
|         | 1                               | C <sub>133</sub> H <sub>197</sub> N <sub>39</sub> O <sub>44</sub> S <sub>7</sub> | 3268.2                | 3268.4              |
|         | 2                               | C <sub>118</sub> H <sub>180</sub> N <sub>36</sub> O <sub>41</sub> S <sub>5</sub> | 2917.2                | 2917.1              |
|         | 3                               | C <sub>106</sub> H <sub>156</sub> N <sub>34</sub> O <sub>35</sub> S <sub>6</sub> | 2657.0                | 2657.1              |
|         | 4                               | C <sub>90</sub> H <sub>138</sub> N <sub>30</sub> O <sub>31</sub> S <sub>3</sub>  | 2230.9                | 2230.7              |
| H27A    | 0                               | C <sub>147</sub> H <sub>218</sub> N <sub>40</sub> O <sub>47</sub> S <sub>7</sub> | 3519.4                | 3519.4              |
|         | 1                               | C <sub>132</sub> H <sub>199</sub> N <sub>37</sub> O <sub>43</sub> S <sub>7</sub> | 3214.3                | 3214.1              |
|         | 2                               | C <sub>117</sub> H <sub>182</sub> N <sub>34</sub> O <sub>40</sub> S <sub>5</sub> | 2863.2                | 2863.1              |
|         | 3                               | C <sub>105</sub> H <sub>158</sub> N <sub>32</sub> O <sub>34</sub> S <sub>6</sub> | 2603.0                | 2602.9              |
|         | 4                               | C <sub>89</sub> H <sub>140</sub> N <sub>28</sub> O <sub>30</sub> S <sub>3</sub>  | 2176.9                | 2176.9              |
| H27W    | 0                               | C <sub>155</sub> H <sub>223</sub> N <sub>41</sub> O <sub>47</sub> S <sub>7</sub> | 3634.4                | 3634.2              |
|         | 1                               | C <sub>140</sub> H <sub>204</sub> N <sub>38</sub> O <sub>43</sub> S <sub>7</sub> | 3329.3                | 3329.8              |
|         | 2                               | C <sub>125</sub> H <sub>187</sub> N <sub>35</sub> O <sub>40</sub> S <sub>5</sub> | 2978.2                | 2977.9              |
|         | 3                               | C <sub>113</sub> H <sub>163</sub> N <sub>33</sub> O <sub>34</sub> S <sub>6</sub> | 2718.0                | 2718.0              |
|         | 4                               | C <sub>97</sub> H <sub>145</sub> N <sub>29</sub> O <sub>30</sub> S <sub>3</sub>  | 2292.0                | 2292.0              |
| F29A    | 0                               | C <sub>144</sub> H <sub>216</sub> N <sub>42</sub> O <sub>47</sub> S <sub>7</sub> | 3509.4                | 3509.3              |
|         | 1                               | C <sub>135</sub> H <sub>201</sub> N <sub>39</sub> O <sub>43</sub> S <sub>7</sub> | 3280.3                | 3280.4              |
|         | 2                               | C <sub>120</sub> H <sub>184</sub> N <sub>36</sub> O <sub>40</sub> S <sub>5</sub> | 2929.2                | 2929.3              |
|         | 3                               | C <sub>108</sub> H <sub>160</sub> N <sub>34</sub> O <sub>34</sub> S <sub>6</sub> | 2669.0                | 2669.1              |
|         | 4                               | C <sub>92</sub> H <sub>142</sub> N <sub>30</sub> O <sub>30</sub> S <sub>3</sub>  | 2243.0                | 2242.9              |

**Table S4.** Calculated sedimentation coefficients of F2A.<sup>a</sup>

| Concentration ( $\mu\text{M}$ ) | $S_{20,w}$ (S) | $D$ (F) | MW (kDa) | Partial Specific Volume (mL/g) |
|---------------------------------|----------------|---------|----------|--------------------------------|
| 40 <sup>b</sup>                 | 0.798          | 12.9    | 5.06     | 0.6973                         |
| 100 <sup>b</sup>                | 0.846          | 14.7    | 4.63     | 0.6973                         |
| 100 <sup>b</sup>                | 0.833          | 15.4    | 4.42     | 0.6973                         |
| 160 <sup>b</sup>                | 0.847          | 15.9    | 4.36     | 0.6973                         |
| 160 <sup>b</sup>                | 0.887          | 16.8    | 4.24     | 0.6973                         |
| 50 <sup>c</sup>                 | 0.796          | 10.6    | 6.04     | 0.6973                         |
| 50 <sup>c</sup>                 | 0.762          | 10.7    | 5.69     | 0.6973                         |
| 100 <sup>c</sup>                | 0.790          | 12.9    | 4.92     | 0.6973                         |
| 100 <sup>c</sup>                | 0.792          | 11.6    | 5.54     | 0.6973                         |
| 160 <sup>c</sup>                | 0.808          | 15.1    | 4.29     | 0.6973                         |
| 160 <sup>c</sup>                | 0.783          | 13.8    | 4.56     | 0.6973                         |

<sup>a</sup> The temperature was 20 °C. Data were obtained by analysis with the dc/dt method implemented in DCDT+ using 26-34 scans with 50 kDa diffusion broadening maximum. Sedimentation coefficients are  $s_{20,w}$  values, adjusted with a solvent density ( $\rho$ ) of 0.99967 g/mL, and a solvent viscosity ( $\eta$ ) of 1.0061 cP. Viscosity units are in centipoise (cP) (1 Poise = 1 g · cm<sup>-1</sup> · s<sup>-1</sup>). Sedimentation coefficients are in Svedbergs (1 Svedberg = 100 fs = 1 × 10<sup>-13</sup> s). Diffusion coefficients correspond to the best-fit molecular mass in Fick units (1 Fick = 1 × 10<sup>-7</sup> cm<sup>2</sup>/s). <sup>b</sup> The samples were in 10 mM sodium phosphate pH 7.4. <sup>c</sup> The samples were in 10 mM Tris-maleate pH 6.4.

**Table S5.** Calculated sedimentation coefficients of F29A.<sup>a</sup>

| Concentration (μM) | $S_{20,w}$ (S) | $D$ (F) | MW (kDa) | Partial Specific Volume (mL/g) |
|--------------------|----------------|---------|----------|--------------------------------|
| 40 <sup>b</sup>    | 1.242          | 16.4    | 6.19     | 0.6973                         |
| 40 <sup>b</sup>    | 1.154          | 15.4    | 6.00     | 0.6973                         |
| 100 <sup>b</sup>   | 1.271          | 13.5    | 7.56     | 0.6973                         |
| 100 <sup>b</sup>   | 1.232          | 14.1    | 7.02     | 0.6973                         |
| 160 <sup>b</sup>   | 1.284          | 14.4    | 7.31     | 0.6973                         |
| 160 <sup>b</sup>   | 1.239          | 13.8    | 7.18     | 0.6973                         |
| 50 <sup>c</sup>    | 1.161          | 14.5    | 6.42     | 0.6973                         |
| 50 <sup>c</sup>    | 1.125          | 11.0    | 8.21     | 0.6973                         |
| 100 <sup>c</sup>   | 1.272          | 14.7    | 7.01     | 0.6973                         |
| 100 <sup>c</sup>   | 1.215          | 12.7    | 7.66     | 0.6973                         |
| 160 <sup>c</sup>   | 1.175          | 13.4    | 7.01     | 0.6973                         |
| 160 <sup>c</sup>   | 1.147          | 12.0    | 7.64     | 0.6973                         |

<sup>a</sup> The temperature was 20 °C. Data were obtained by analysis with the dc/dt method implemented in DCDT+ using 26-34 scans with 50 kDa diffusion broadening maximum. Sedimentation coefficients are  $s_{20,w}$  values, adjusted with a solvent density ( $\rho$ ) of 0.99967 g/mL, and a solvent viscosity ( $\eta$ ) of 1.0061 cP. Viscosity units are in centipoise (cP) (1 Poise = 1 g · cm<sup>-1</sup> · s<sup>-1</sup>). Sedimentation coefficients are in Svedbergs (1 Svedberg = 100 fs = 1 × 10<sup>-13</sup> s). Diffusion coefficients correspond to the best-fit molecular mass in Fick units (1 Fick = 1 × 10<sup>-7</sup> cm<sup>2</sup>/s). <sup>b</sup> The samples were in 10 mM sodium phosphate pH 7.4. <sup>c</sup> The samples were in 10 mM Tris-maleate pH 6.4.

**Table S6.** Sedimentation coefficient calculations using HYDROPRO.<sup>S3</sup>

| Species      | $S_{20,w}$ (S) | Partial Specific Volume (mL/g) <sup>a</sup> |
|--------------|----------------|---------------------------------------------|
| HD6 monomer  | 0.746          | 0.6994                                      |
| HD6 dimer    | 1.17           | 0.6994                                      |
| HD6 tetramer | 1.83           | 0.6994                                      |

<sup>a</sup> Monomer, dimer, tetramer  $\bar{v}$  values of HD6 were estimated by SEDNTERP.<sup>S4</sup>

**Table S7.** Primers employed for subcloning and site-directed mutagenesis.<sup>a</sup>

| Primer | Sequence                                                   |
|--------|------------------------------------------------------------|
| HD6    | 5'-GAATTCCATATGGAGCCGCTGCAAGCAG-3'                         |
| HD6-R  | 5'-GATCCTCGAG <b>TTAC</b> CAGACAACAAAAGCGATG-3'            |
| F2A    | 5'-GTAGCACGCGTGCA <u>GCG</u> ACTTGCCACTGC-3'               |
| F2A-R  | 5'-GCAGTGGCAAGT <u>GCG</u> TGCACGCGTGCTAC-3'               |
| V22T   | 5'-GCTATGGCACCTGCACG <u>ACC</u> ATGGGCATTAATC-3'           |
| V22T-R | 5'-GATTAATGCCCAT <u>GGT</u> CGTGCAGGTGCCATAGC-3'           |
| I25T   | 5'-CACGGTGATGGGC <u>ACC</u> AATCATGCGTTTTG-3'              |
| I25T-R | 5'-CAAAGCGATGATT <u>GGT</u> GCCCATCACCGTG-3'               |
| H27A   | 5'-GGTGATGGGCATTAAT <u>GCG</u> CGCTTTTGTGTCTG-3'           |
| H27A-R | 5'-CAGACAACAAAAGCG <u>GCG</u> ATTAATGCCCATCACC-3'          |
| H27W   | 5'-GGTGATGGGCATTAAT <u>TGG</u> CGCTTTTGTGTCTG-3'           |
| H27W-R | 5'-CAGACAACAAAAGCG <u>CCA</u> ATTAATGCCCATCACC-3'          |
| F29A   | 5'-GCATTAATCATCGC <u>GCG</u> TGTTGTCTG <b>TAA</b> CTCG-3'  |
| F29A-R | 5'-CGAG <b>TTAC</b> CAGACAACA <u>GCG</u> GCGATGATTAATGC-3' |

<sup>a</sup> Underlined black codons indicate restriction sites. Bold codons indicate stop codons. The codons containing the mutations are underlined and highlighted in red.

**Table S8.** Templates and primer pairings employed in site-directed mutagenesis.

| Template      | Product             | Primers Used |
|---------------|---------------------|--------------|
| pET28b-proHD6 | pET28b-proHD6(F2A)  | F2A, F2A-R   |
| pET28b-proHD6 | pET28b-proHD6(V22T) | V22T, V22T-R |
| pET28b-proHD6 | pET28b-proHD6(I25T) | I25T, I25T-R |
| pET28b-proHD6 | pET28b-proHD6(H27A) | H27A, H27A-R |
| pET28b-proHD6 | pET28b-proHD6(H27W) | H27W, H27W-R |
| pET28b-proHD6 | pET28b-proHD6(F29A) | F29A, F29A-R |

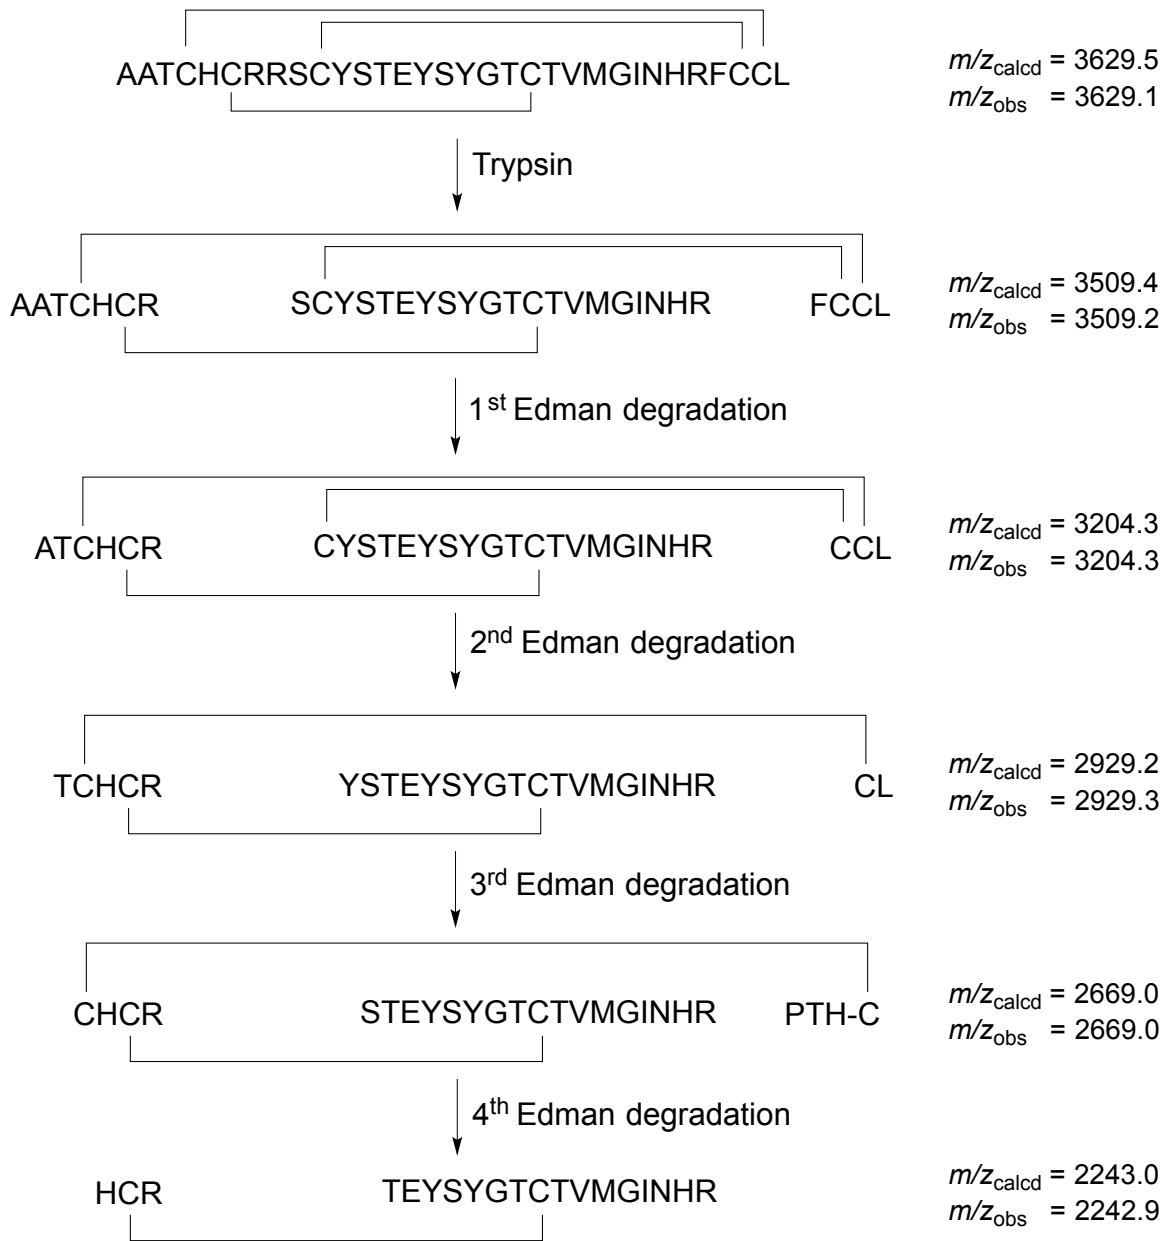

**Scheme S1.** Determination of disulfide bond connectivity of F2A by employing trypsin digestion and manual Edman degradation. This step-by-step summary applies for all HD6 mutants analyzed in this work. The calculated and observed masses of all mutant HD6 are listed in Table S3.

HNP1 ACYCRIPACIAGERRYGTCTIYQGRLWAFCC  
 HNP2 CYCRIPACIAGERRYGTCTIYQGRLWAFCC  
 HNP3 DCYCRIPACIAGERRYGTCTIYQGRLWAFCC  
 HNP4 VCSCRLVFCRRETLRVGNCLIGGVSF TYCCTRVD  
 HD5 ATCYCRTGRCATRESLSGVCEISGRLYRLCCR  
 HD6 AFTCHCRR-SCYSTEYSYGTCTVMGINHRFCCL

**Figure S1.** Amino acid sequence alignment of human  $\alpha$ -defensins with the hydrophobic residues labeled in red. The sequences of human neutrophil  $\alpha$ -defensins (HNP1-4) and human Paneth cell  $\alpha$ -defensins (HD5 and HD6) are aligned in a single-letter notation using the Cys<sup>1</sup> residue as the reference point. A dash (“-”) in the HD6 sequence is used to maintain alignment of all Cys residues.

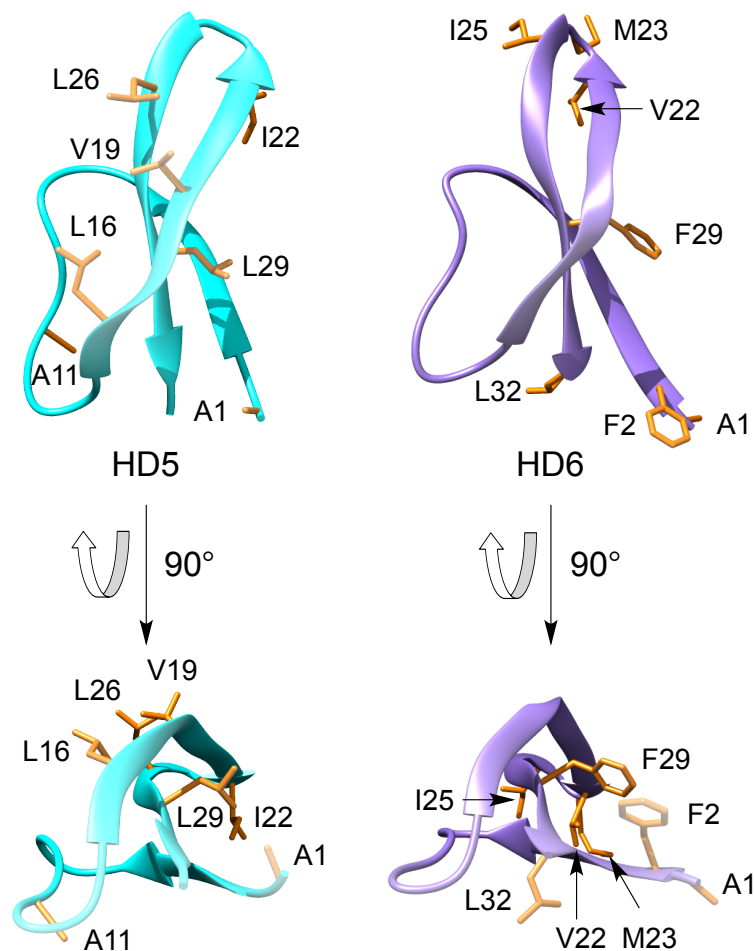

**Figure S2.** Previously reported X-ray crystal structures of HD5 (PDB: 1ZMP, cyan)<sup>S5</sup> and HD6 (PDB: 1ZMQ, purple)<sup>S5</sup> showing hydrophobic residues in orange.

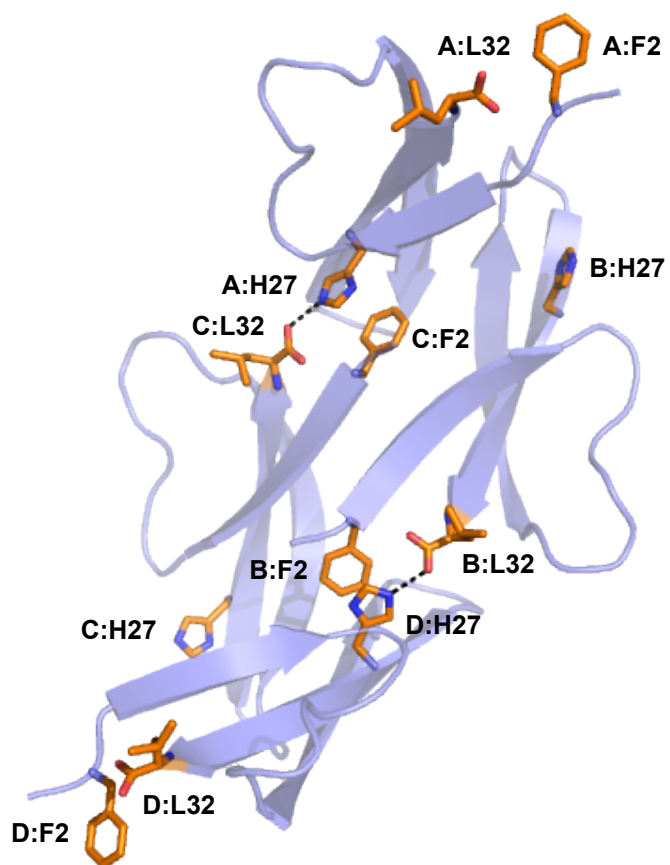

**Figure S3.** Previously reported X-ray crystal structure of HD6 (PDB: 1ZMQ)<sup>S5</sup> with F2, H27, and L32 shown. Individual HD6 monomers are labeled A-D. The electrostatic interaction between H27 of one monomer and carboxylate of a C-terminus of another monomer is indicated by a dashed line.



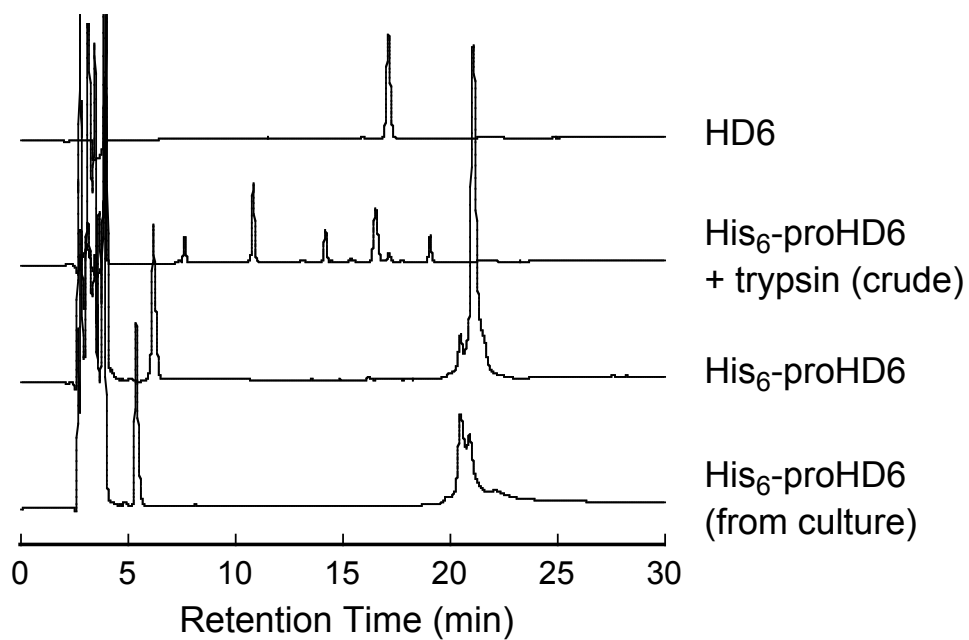

**Figure S4.** Analytical HPLC traces from a representative overexpression of His<sub>6</sub>-proHD6 and purification of HD6 (30  $\mu$ M x 80  $\mu$ L). Absorbance at 220 nm was monitored with a reference wavelength of 500 nm. Method: 10–60% B over 30 min at 1 mL/min.

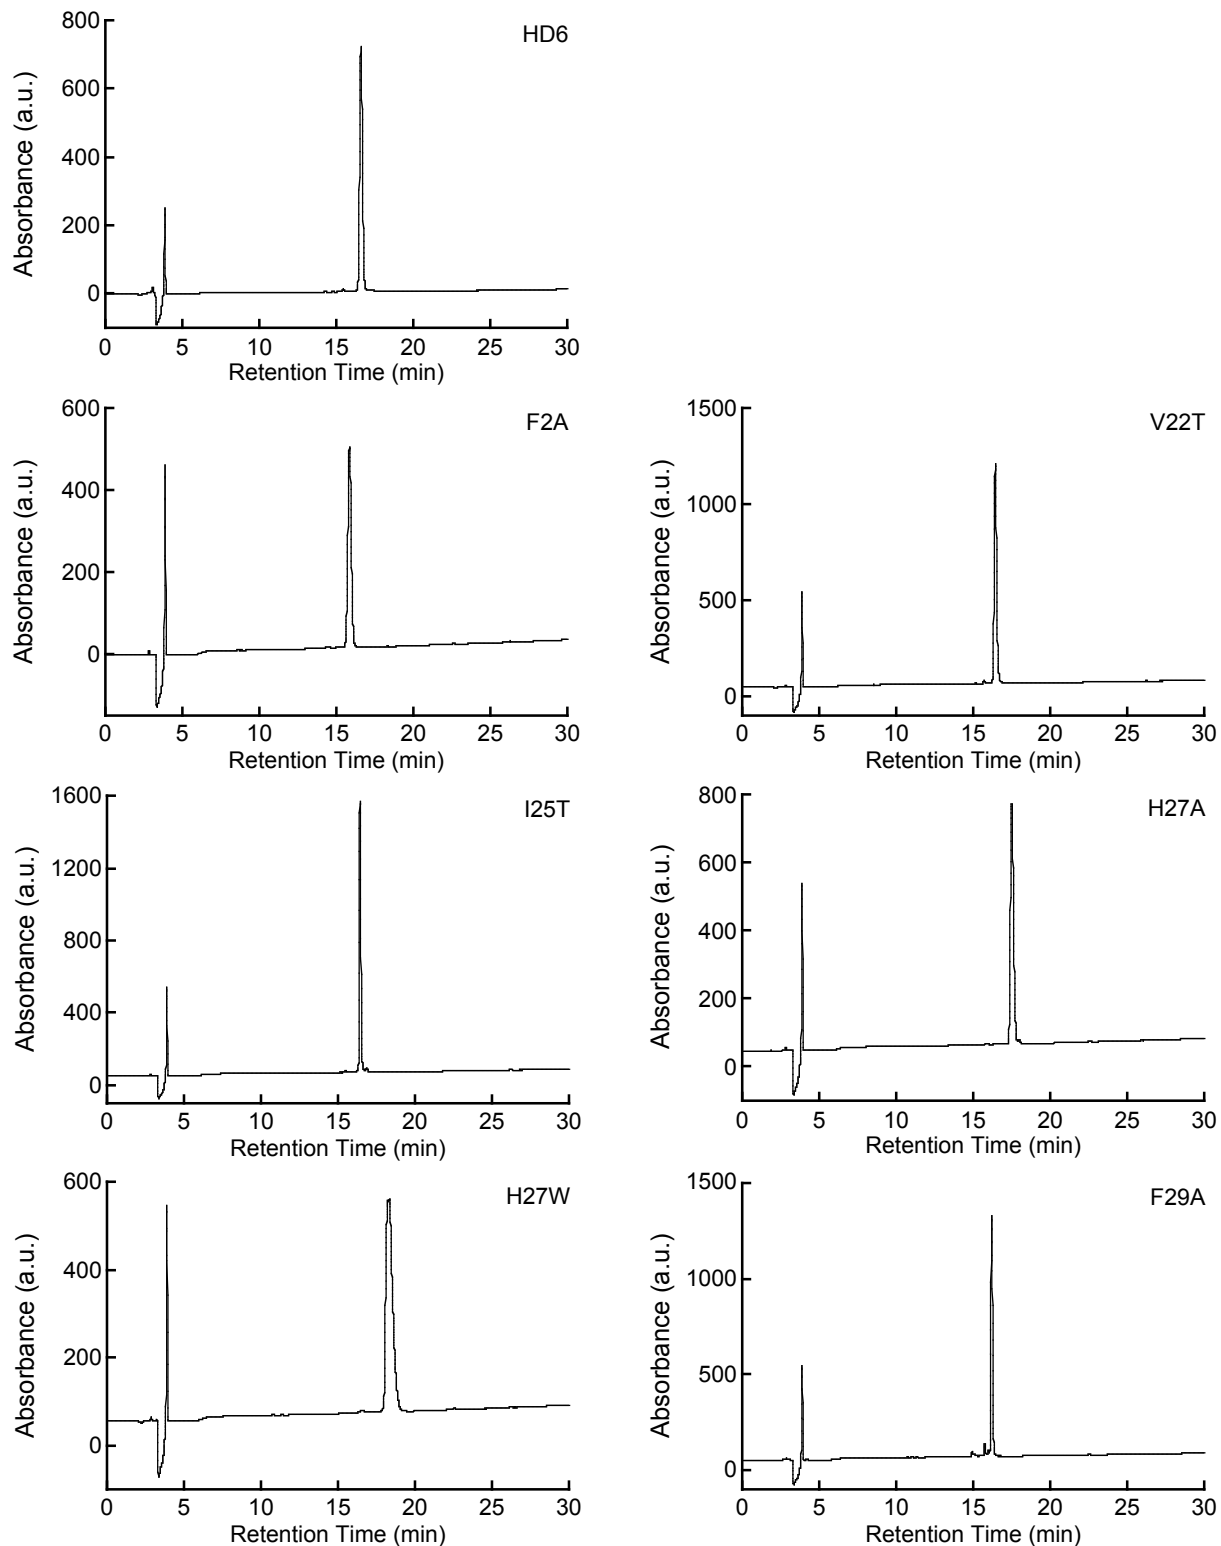

**Figure S5.** Analytical HPLC traces of native and mutant HD6 (30  $\mu$ M x 80  $\mu$ L). Absorbance at 220 nm was monitored with a reference wavelength of 500 nm. Method: 10–60% B over 30 min at 1 mL/min.

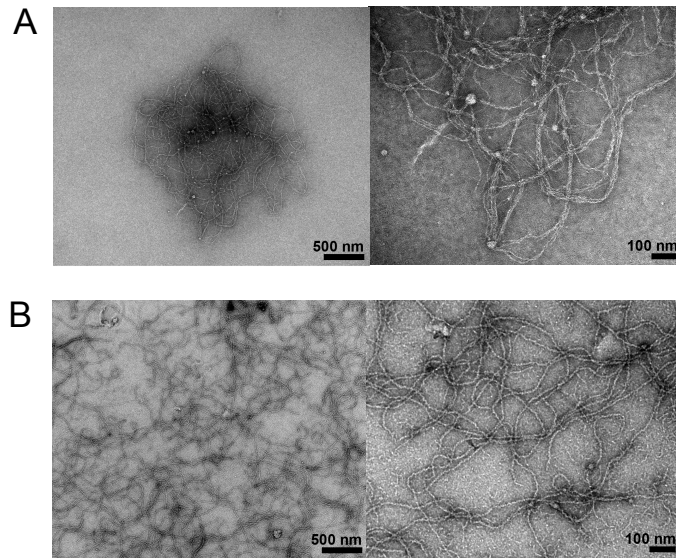

**Figure S6.** Transmission electron micrographs of HD6 at pH 7.4 (10 mM sodium phosphate). (A) 2  $\mu$ M HD6 and (B) 20  $\mu$ M HD6 at magnification of 30,000x (left) and 98,000x (right).

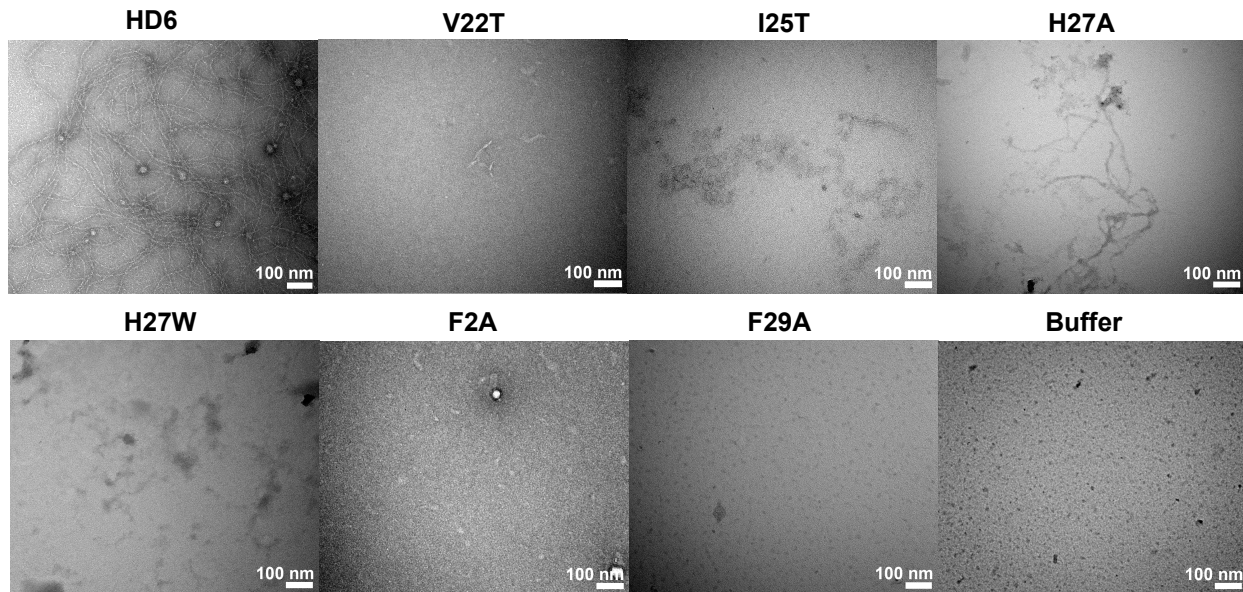

**Figure S7.** Transmission electron micrographs of native and mutant HD6. The peptide concentrations were 20  $\mu$ M and all samples were incubated in 10 mM Tris-maleate pH 6.4 for at least 2 h.

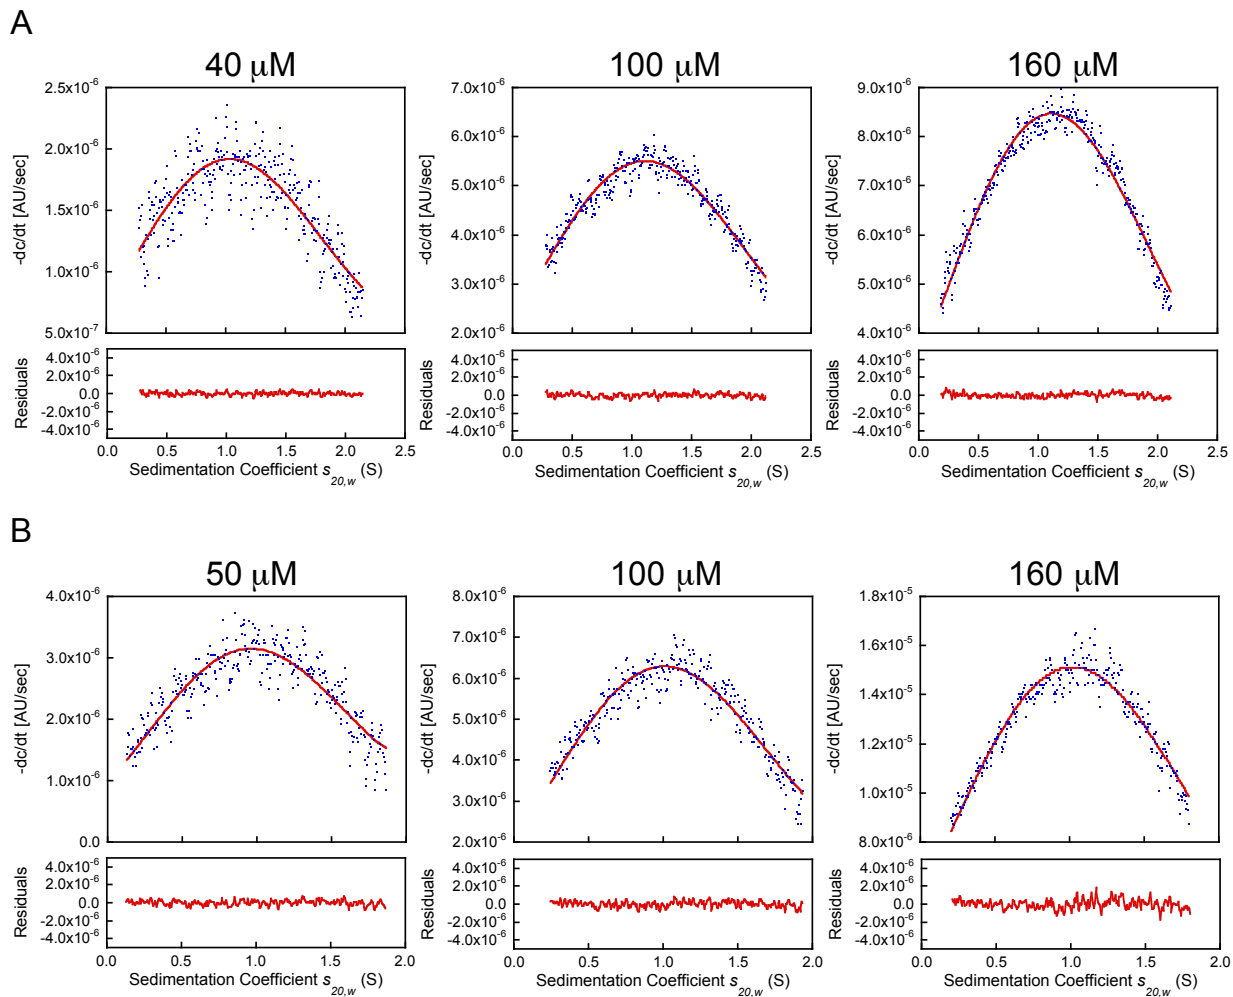

**Figure S8.** Sedimentation velocity experiments of F2A in (A) 10 mM sodium phosphate pH 7.4 and (B) 10 mM Tris-maleate pH 6.4 shown as single Gaussian fits (red line) of  $-dc/dt$  data (blue dots) measured with UV absorbance at 280 nm. The peptide concentrations ranged from 40  $\mu\text{M}$  to 160  $\mu\text{M}$ . The summaries of the fits are provided in Table S3.

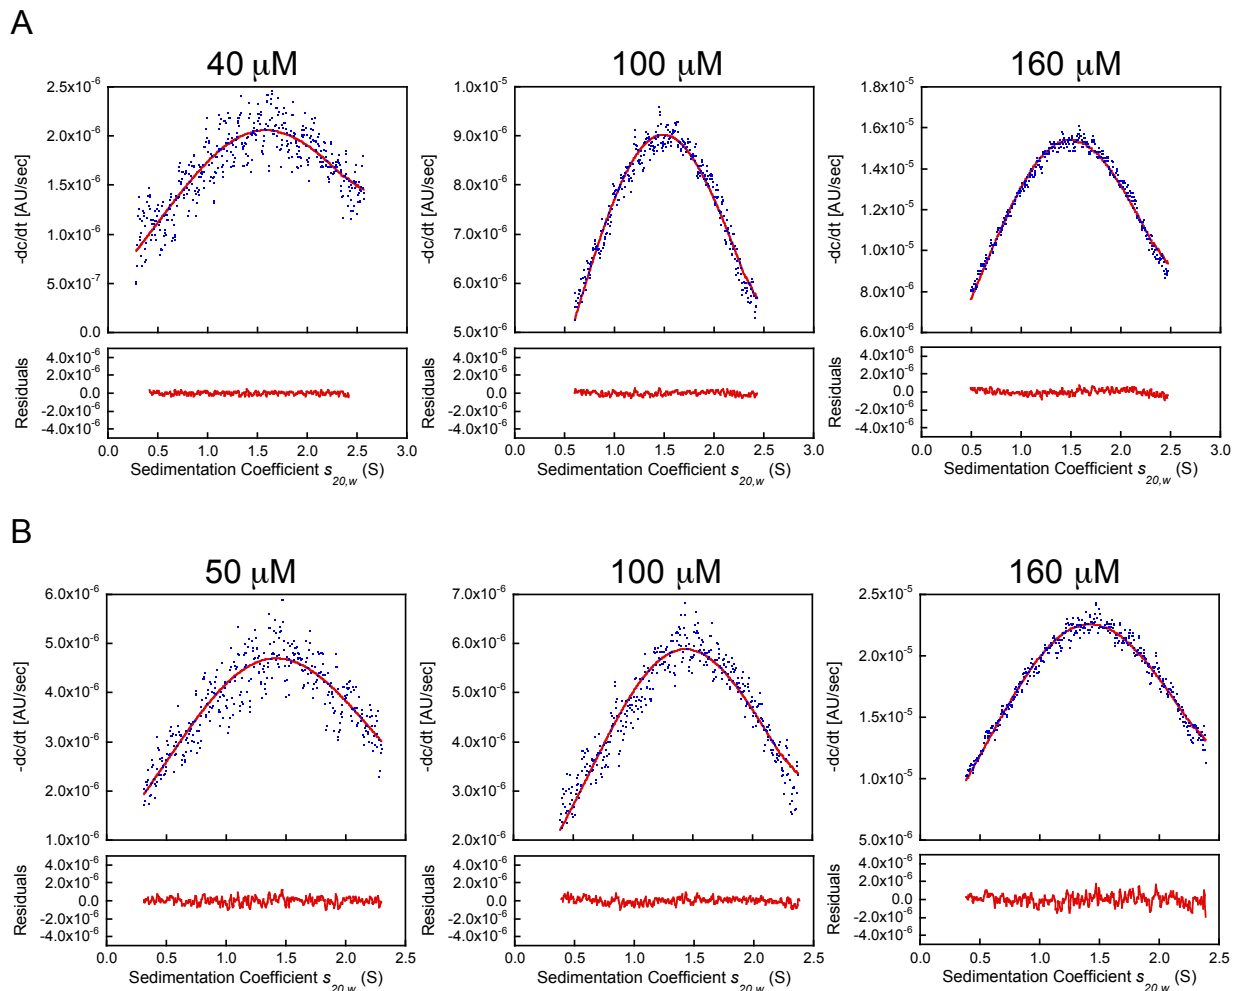

**Figure S9.** Sedimentation velocity experiments of F29A in (A) 10 mM sodium phosphate pH 7.4 and (B) 10 mM Tris-maleate pH 6.4 shown as single Gaussian fits (red line) of  $-dc/dt$  data (blue dots) measured with UV absorbance at 280 nm. The peptide concentrations ranged from 50  $\mu$ M to 160  $\mu$ M. The summaries of the fits are provided in Table S4.

The fits of the  $-dc/dt$  data shown in this work were obtained by using a one-species model. We also fit the data from the 160  $\mu$ M sample of F29A with a two-species model, and this analysis did not improve the residuals when compared to the one-species model. In total, the Gaussian fits suggest that F29A at higher concentrations primarily exists as a species with  $S \sim 1.2$ . There may be a low abundance of a higher-order oligomer.

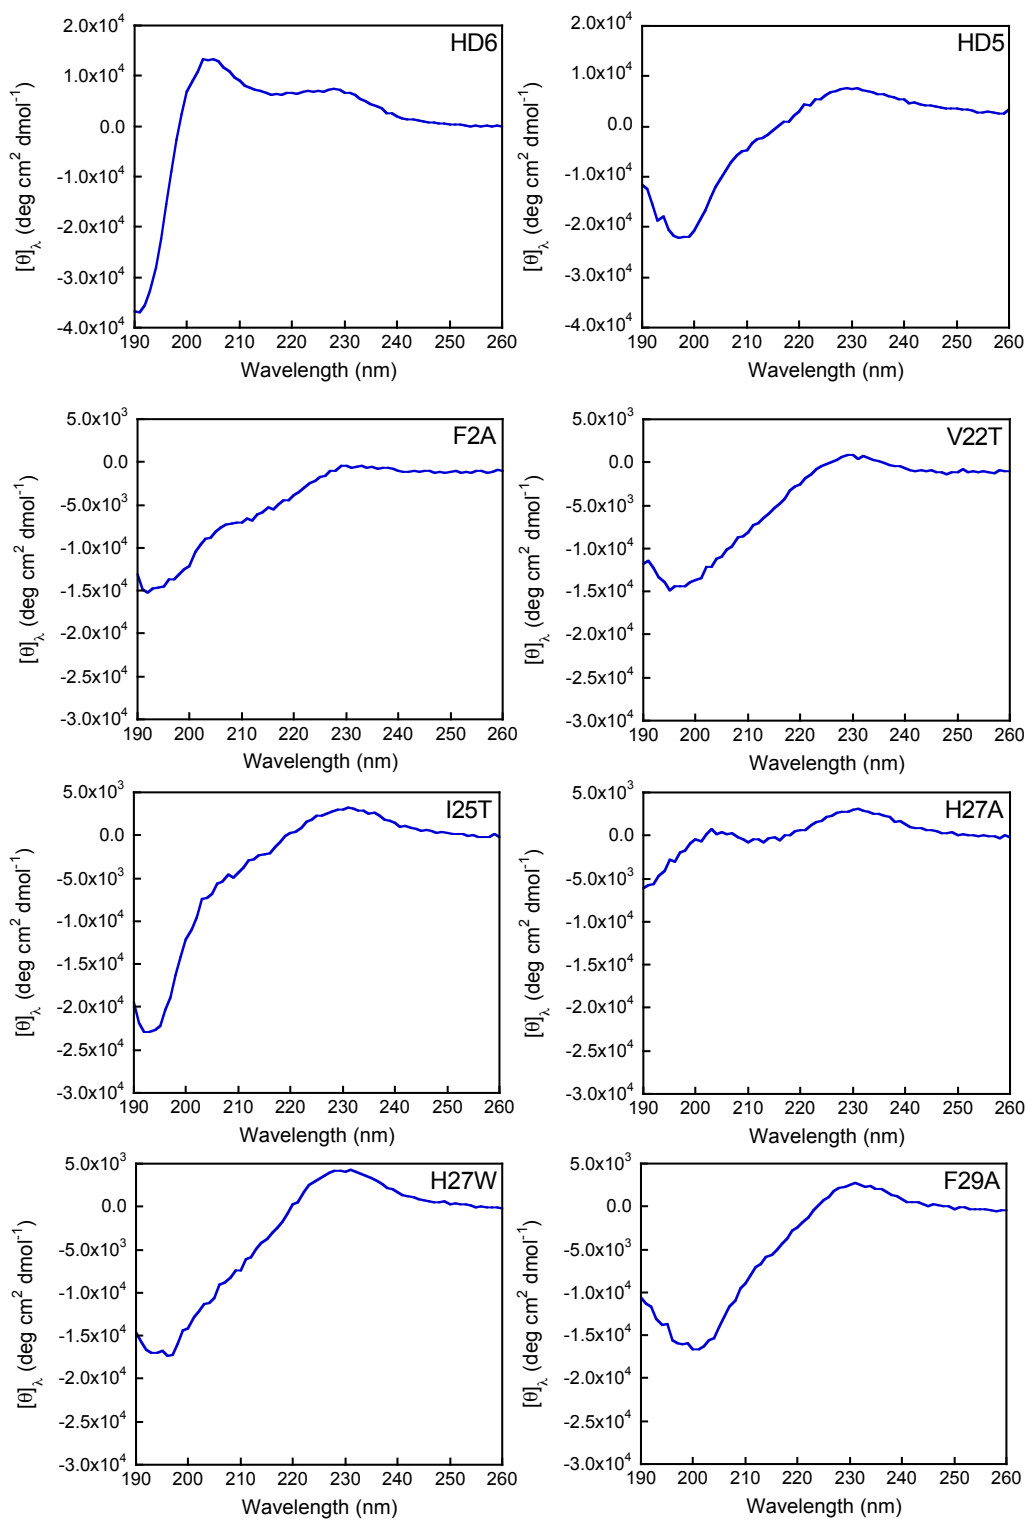

**Figure S10.** CD spectra of HD5 and native and mutant HD6 at pH 7.4 in 10 mM sodium phosphate. The peptide concentrations were 20  $\mu$ M.

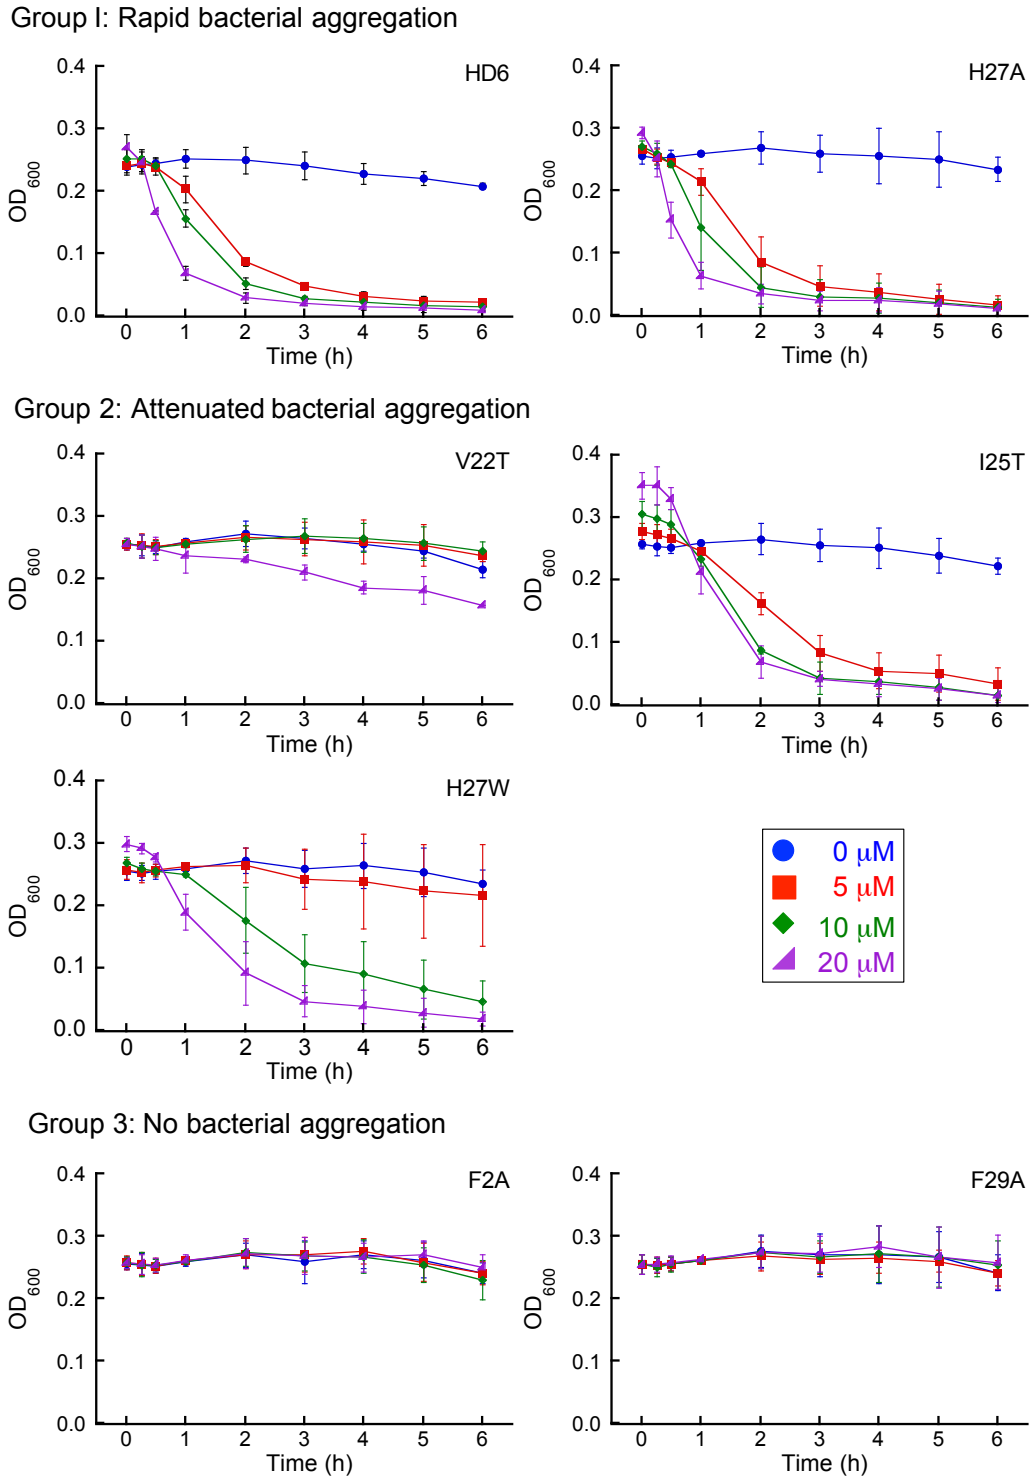

**Figure S11.** Agglutination assays of *L. monocytogenes* ATCC 19115 incubated with 0-20  $\mu\text{M}$  HD6 or mutant (mean  $\pm$  SDM,  $n = 3$ ). Plots of HD6, F2A, H27A, and F29A correspond to Figure 4A and are shown here to facilitate comparison.

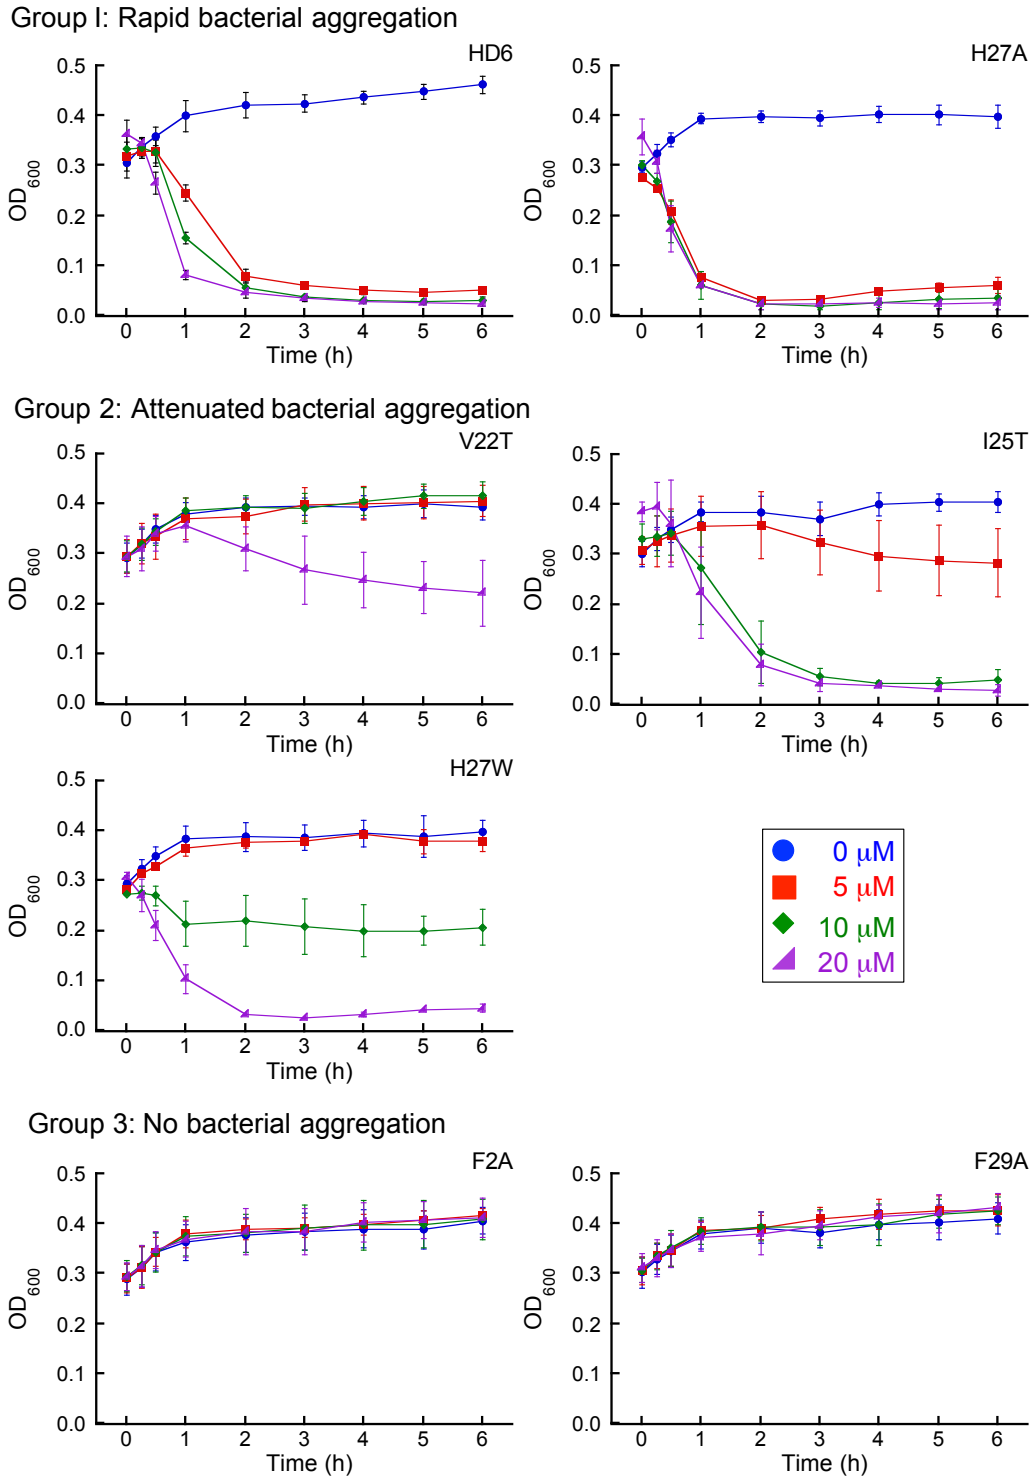

**Figure S12.** Agglutination assays of *E. coli* ATCC 25922 incubated with 0-20 μM HD6 or mutant (mean ± SDM, n = 3). Plots of HD6, F2A, H27A, and F29A correspond to Figure 4A and are shown here to facilitate comparison.



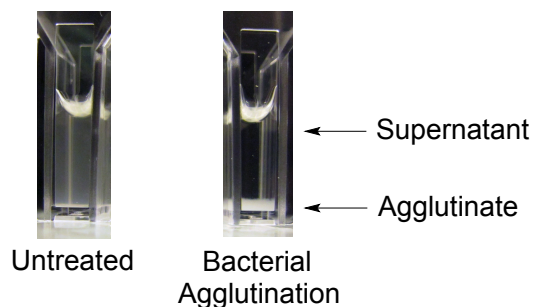

**Figure S13.** Representative image of an untreated *L. monocytogenes* culture and a culture after incubation with 20  $\mu$ M HD6 for 6 h at 4t. The mixture is separated into two phases: supernatant and agglutinate as indicated in the figure.

### Supporting References

- (S1) Wanniarachchi, Y. A.; Kaczmarek, P.; Wan, A.; Nolan, E. M. *Biochemistry* **2011**, *50*, 8005-8017.
- (S2) Klemm, P. *Methods in Molecular Biology*; Walker, J. M., Ed; Humana Press: 1984, pp 243-254.
- (S3) Ortega, A.; Amoros, D.; de la Torre, J. G. *Biophys. J.* **2011**, *101*, 892-898.
- (S4) Laue, M.; Shah, B. D.; Ridgeway, T. M.; Pelletier, S. L. *Analytical Ultracentrifugation in Biochemistry and Polymer Science*; Harding, S., Rowe, A., Eds.; Royal Society of Chemistry: 1992, pp 90-125.
- (S5) Szyk, A.; Wu, Z.; Tucker, K.; Yang, D.; Lu, W.; Lubkowski, J. *Prot. Sci.* **2006**, *15*, 2749-2760.
